# Supplementary material
Source: publisher site journal article supplement (https://biss.pensoft.net/article/download/suppl/4784871/)
Supplement: Supplementary file 1

alien	INTRODUCED
captive	MANAGED
cultivada	MANAGED
cultivated	MANAGED
cultivated	MANAGED
domesticated	MANAGED
doubtful	UNCERTAIN
endemic	NATIVE
endemismo	NATIVE
endémica	NATIVE
exotic	INTRODUCED
indigenous	NATIVE
introduced	INTRODUCED
introducida	INTRODUCED
invasiv	INVASIVE
invasive	INVASIVE
managed	MANAGED
nativa	NATIVE
native	NATIVE
nativo	NATIVE
naturalised	NATURALISED
naturalizada	NATURALISED
naturalized	NATURALISED
origin uncertain	UNCERTAIN
origin unknown	UNCERTAIN
reintroduced	NATIVE
transplantadas	INTRODUCED
uncertain	UNCERTAIN
unknown	UNCERTAIN
